# Supplementary material
Source: PubMed Central journal article supplement (PMC6061940)

Figure S2.

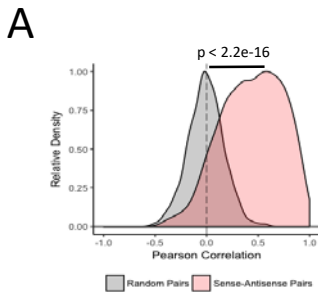

**B**

| Gene Pair Type        | # Pairs | # Gene Pairs, Both Genes Correlated with Ara-C Sensitivity | # Genes Pairs, Sense Gene Correlated with Cognate Antisense Gene | Overlap |
|-----------------------|---------|------------------------------------------------------------|------------------------------------------------------------------|---------|
| Sense-Antisense Pairs | 997     | 113                                                        | 786                                                              | 101     |
| Random Pairs          | 5,000   | 291                                                        | 50                                                               | 10      |

**C** Gene Pairs Correlated with Ara-C Resistance

|         |             |  |             |                 |  |          |              |
|---------|-------------|--|-------------|-----------------|--|----------|--------------|
| ACOXL   | ACOXL-AS1   |  | INHBA       | INHBA-AS1       |  | P4HA3    | P4HA3-AS1    |
| B4GALT1 | B4GALT1-AS1 |  | IQCJ-SCHIP1 | IQCJ-SCHIP1-AS1 |  | PIK3IP1  | PIK3IP1-AS1  |
| BDNF    | BDNF-AS     |  | ISPD        | ISPD-AS1        |  | PINK1    | PINK1-AS     |
| CCDC183 | CCDC183-AS1 |  | ITGB5       | ITGB5-AS1       |  | PRICKLE2 | PRICKLE2-AS2 |
| CDKN2A  | CDKN2A-AS1  |  | KIRREL3     | KIRREL3-AS2     |  | PRICKLE2 | PRICKLE2-AS3 |
| COL5A1  | COL5A1-AS1  |  | KRT7        | KRT7-AS         |  | PRKG1    | PRKG1-AS1    |
| CPEB2   | CPEB2-AS1   |  | LACTB2      | LACTB2-AS1      |  | RBPMS    | RBPMS-AS1    |
| CXCS    | CXCS-AS1    |  | LIFR        | LIFR-AS1        |  | REERG    | REERG-AS1    |
| DOCK9   | DOCK9-AS2   |  | LOXL1       | LOXL1-AS1       |  | RMDN2    | RMDN2-AS1    |
| EGFR    | EGFR-AS1    |  | LRP1        | LRP1-AS         |  | ROR1     | ROR1-AS1     |
| EXOC3   | EXOC3-AS1   |  | MAMDC2      | MAMDC2-AS1      |  | SEMA5A   | SEMA5A-AS1   |
| FAM83A  | FAM83A-AS1  |  | MKX         | MKX-AS1         |  | SLC2A1   | SLC2A1-AS1   |
| FLNC    | FLNC-AS1    |  | MRV11       | MRV11-AS1       |  | SPON1    | SPON1-AS1    |
| FRMD6   | FRMD6-AS1   |  | NALCN       | NALCN-AS1       |  | TGFB2    | TGFB2-AS1    |
| FRMD6   | FRMD6-AS2   |  | NDST1       | NDST1-AS1       |  | THSD4    | THSD4-AS1    |
| FTCD    | FTCD-AS1    |  | NEURL1      | NEURL1-AS1      |  | TM4SF1   | TM4SF1-AS1   |
| FUT8    | FUT8-AS1    |  | NEXN        | NEXN-AS1        |  | TM4SF19  | TM4SF19-AS1  |
| GAS6    | GAS6-AS2    |  | NTRK3       | NTRK3-AS1       |  | VLDLR    | VLDLR-AS1    |
| GRM5    | GRM5-AS1    |  | OSBPL10     | OSBPL10-AS1     |  | ZNF667   | ZNF667-AS1   |
| GSN     | GSN-AS1     |  | OSMR        | OSMR-AS1        |  | ZNF793   | ZNF793-AS1   |
| IGFBP7  | IGFBP7-AS1  |  | P3H2        | P3H2-AS1        |  |          |              |

Gene Pairs Correlated with Ara-C Sensitivity

|          |              |  |          |              |
|----------|--------------|--|----------|--------------|
| ADARB2   | ADARB2-AS1   |  | MYB      | MYB-AS1      |
| AP4B1    | AP4B1-AS1    |  | MYCBP2   | MYCBP2-AS1   |
| CCND2    | CCND2-AS2    |  | NOP53    | NOP53-AS1    |
| CCNT2    | CCNT2-AS1    |  | PABPC5   | PABPC5-AS1   |
| DCUN1D2  | DCUN1D2-AS   |  | PAXBP1   | PAXBP1-AS1   |
| DLGAP1   | DLGAP1-AS4   |  | PCCA     | PCCA-AS1     |
| DLGAP1   | DLGAP1-AS5   |  | PLCH1    | PLCH1-AS1    |
| ELFN1    | ELFN1-AS1    |  | PRC1     | PRC1-AS1     |
| ENTPD1   | ENTPD1-AS1   |  | RNF219   | RNF219-AS1   |
| FAM53B   | FAM53B-AS1   |  | SLC25A30 | SLC25A30-AS1 |
| FBXW7    | FBXW7-AS1    |  | SLCO4A1  | SLCO4A1-AS1  |
| FOXD2    | FOXD2-AS1    |  | SMAD1    | SMAD1-AS2    |
| GABPB1   | GABPB1-AS1   |  | SMC5     | SMC5-AS1     |
| GTF3C2   | GTF3C2-AS1   |  | SSBP3    | SSBP3-AS1    |
| HHATL    | HHATL-AS1    |  | THAP9    | THAP9-AS1    |
| INTS6    | INTS6-AS1    |  | TMPO     | TMPO-AS1     |
| INTS9    | INTS9-AS1    |  | USP3     | USP3-AS1     |
| KCNIP2   | KCNIP2-AS1   |  | ZBED3    | ZBED3-AS1    |
| LANCL1   | LANCL1-AS1   |  |          |              |
| MAPKAPK5 | MAPKAPK5-AS1 |  |          |              |
| MRGPRG   | MRGPRG-AS1   |  |          |              |

**D**

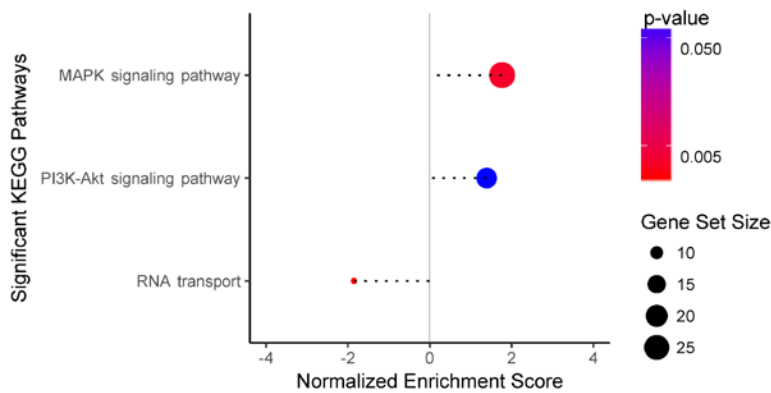

Supplement: NIHMS960108-supplement-2.pdf [file NIHMS960108-supplement-2.pdf]
