# Supplementary material
Source: PubMed Central journal article supplement (PMC6061940)

Figure S1.

A

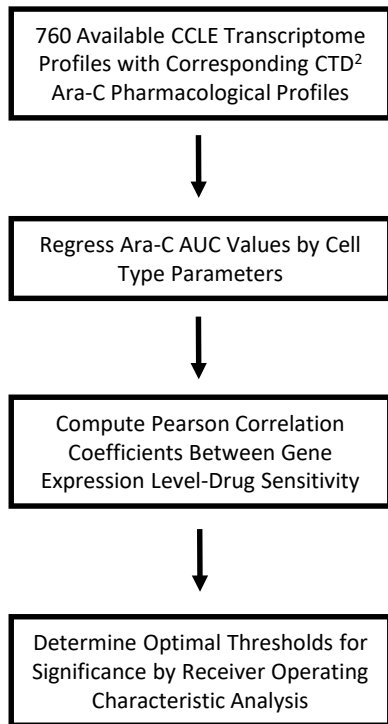

B

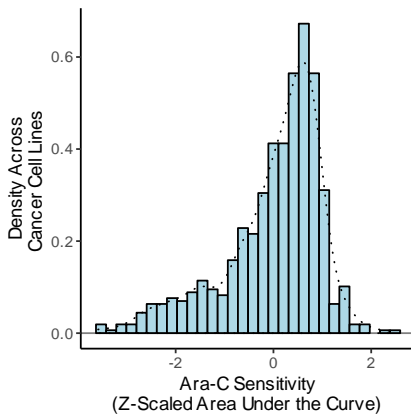

C

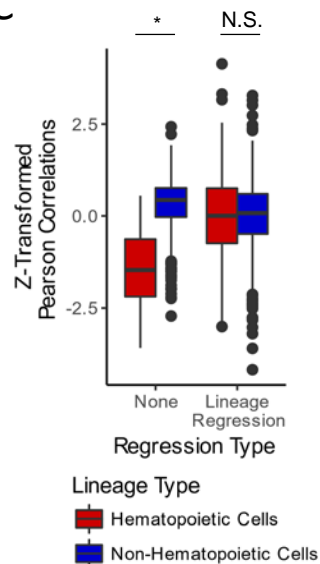

D

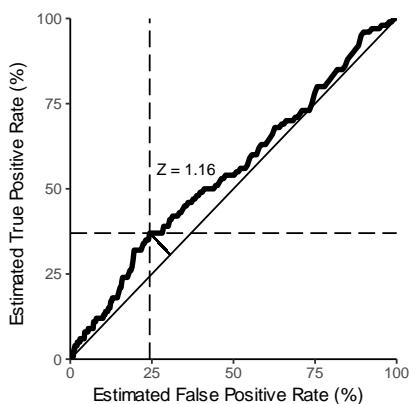

E

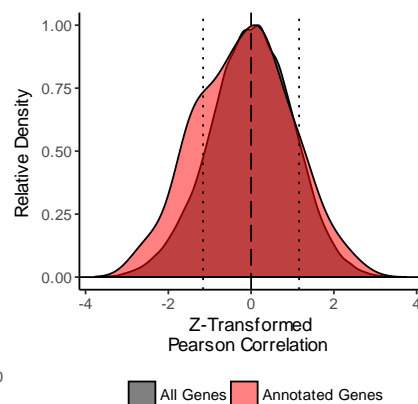

F

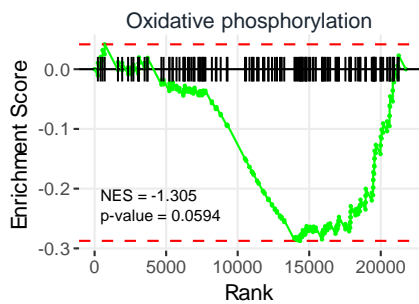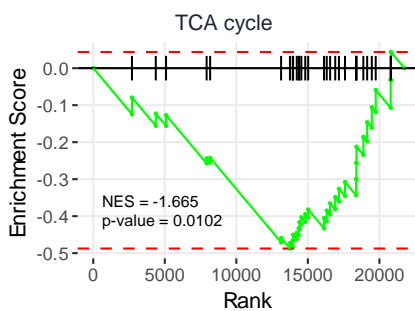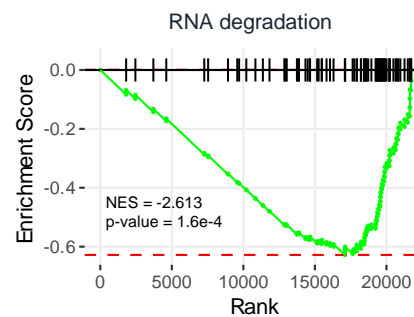

G

H

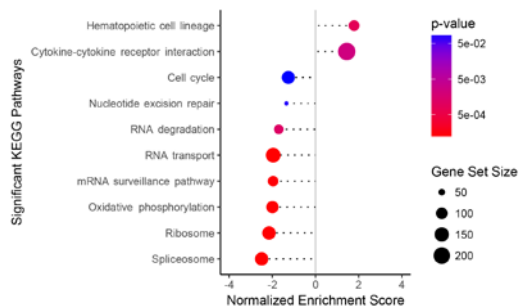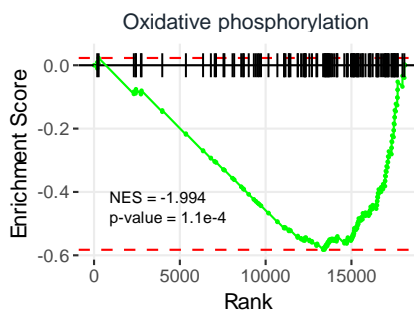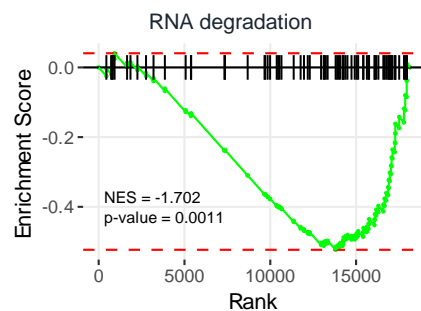

Supplement: NIHMS960108-supplement-1.pdf [file NIHMS960108-supplement-1.pdf]

Figure S3.

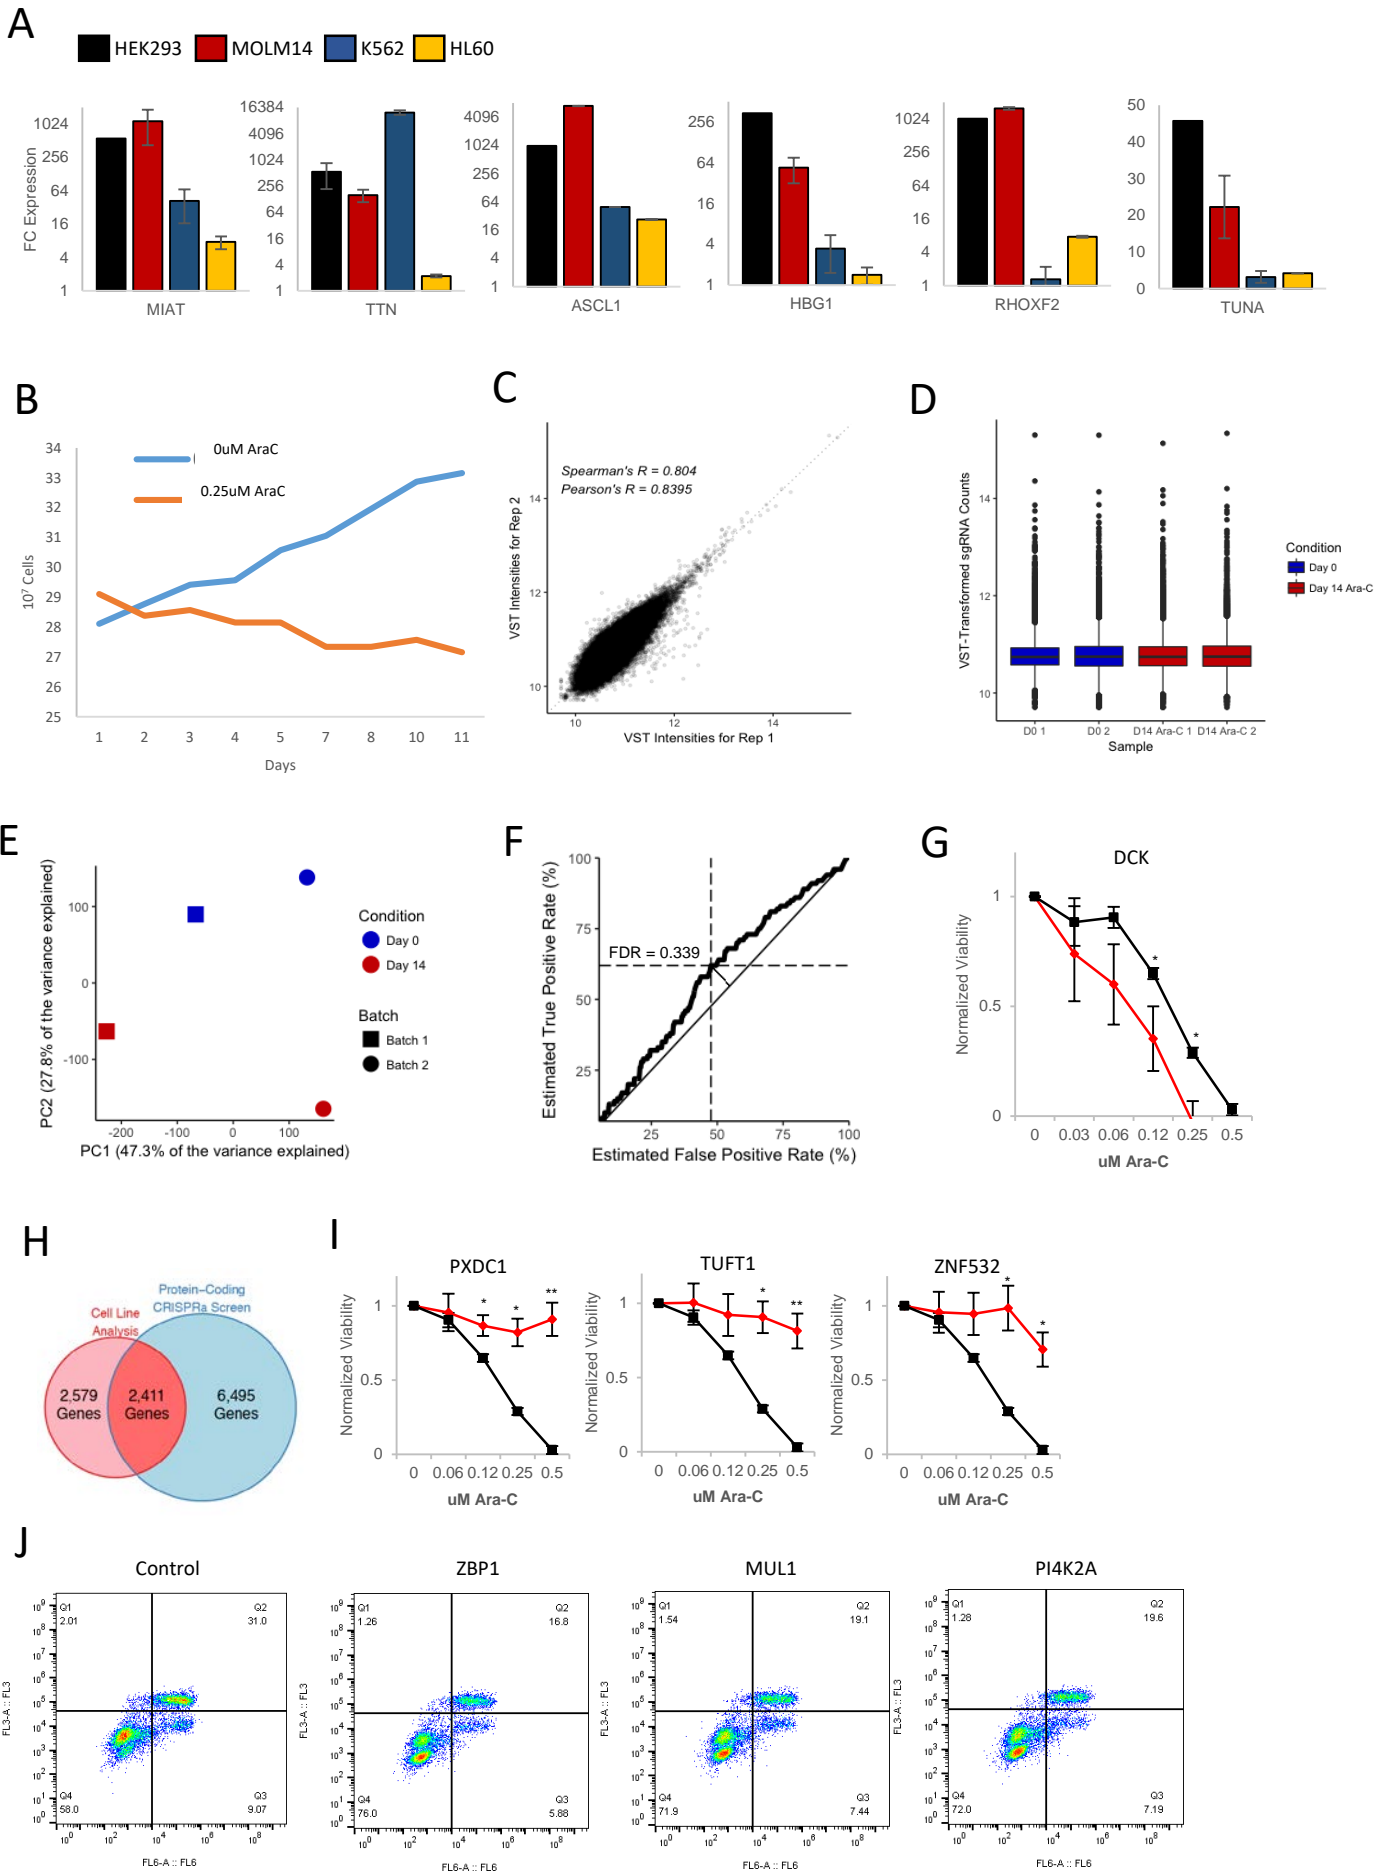

Supplement: NIHMS960108-supplement-3.pdf [file NIHMS960108-supplement-3.pdf]

Figure S4.

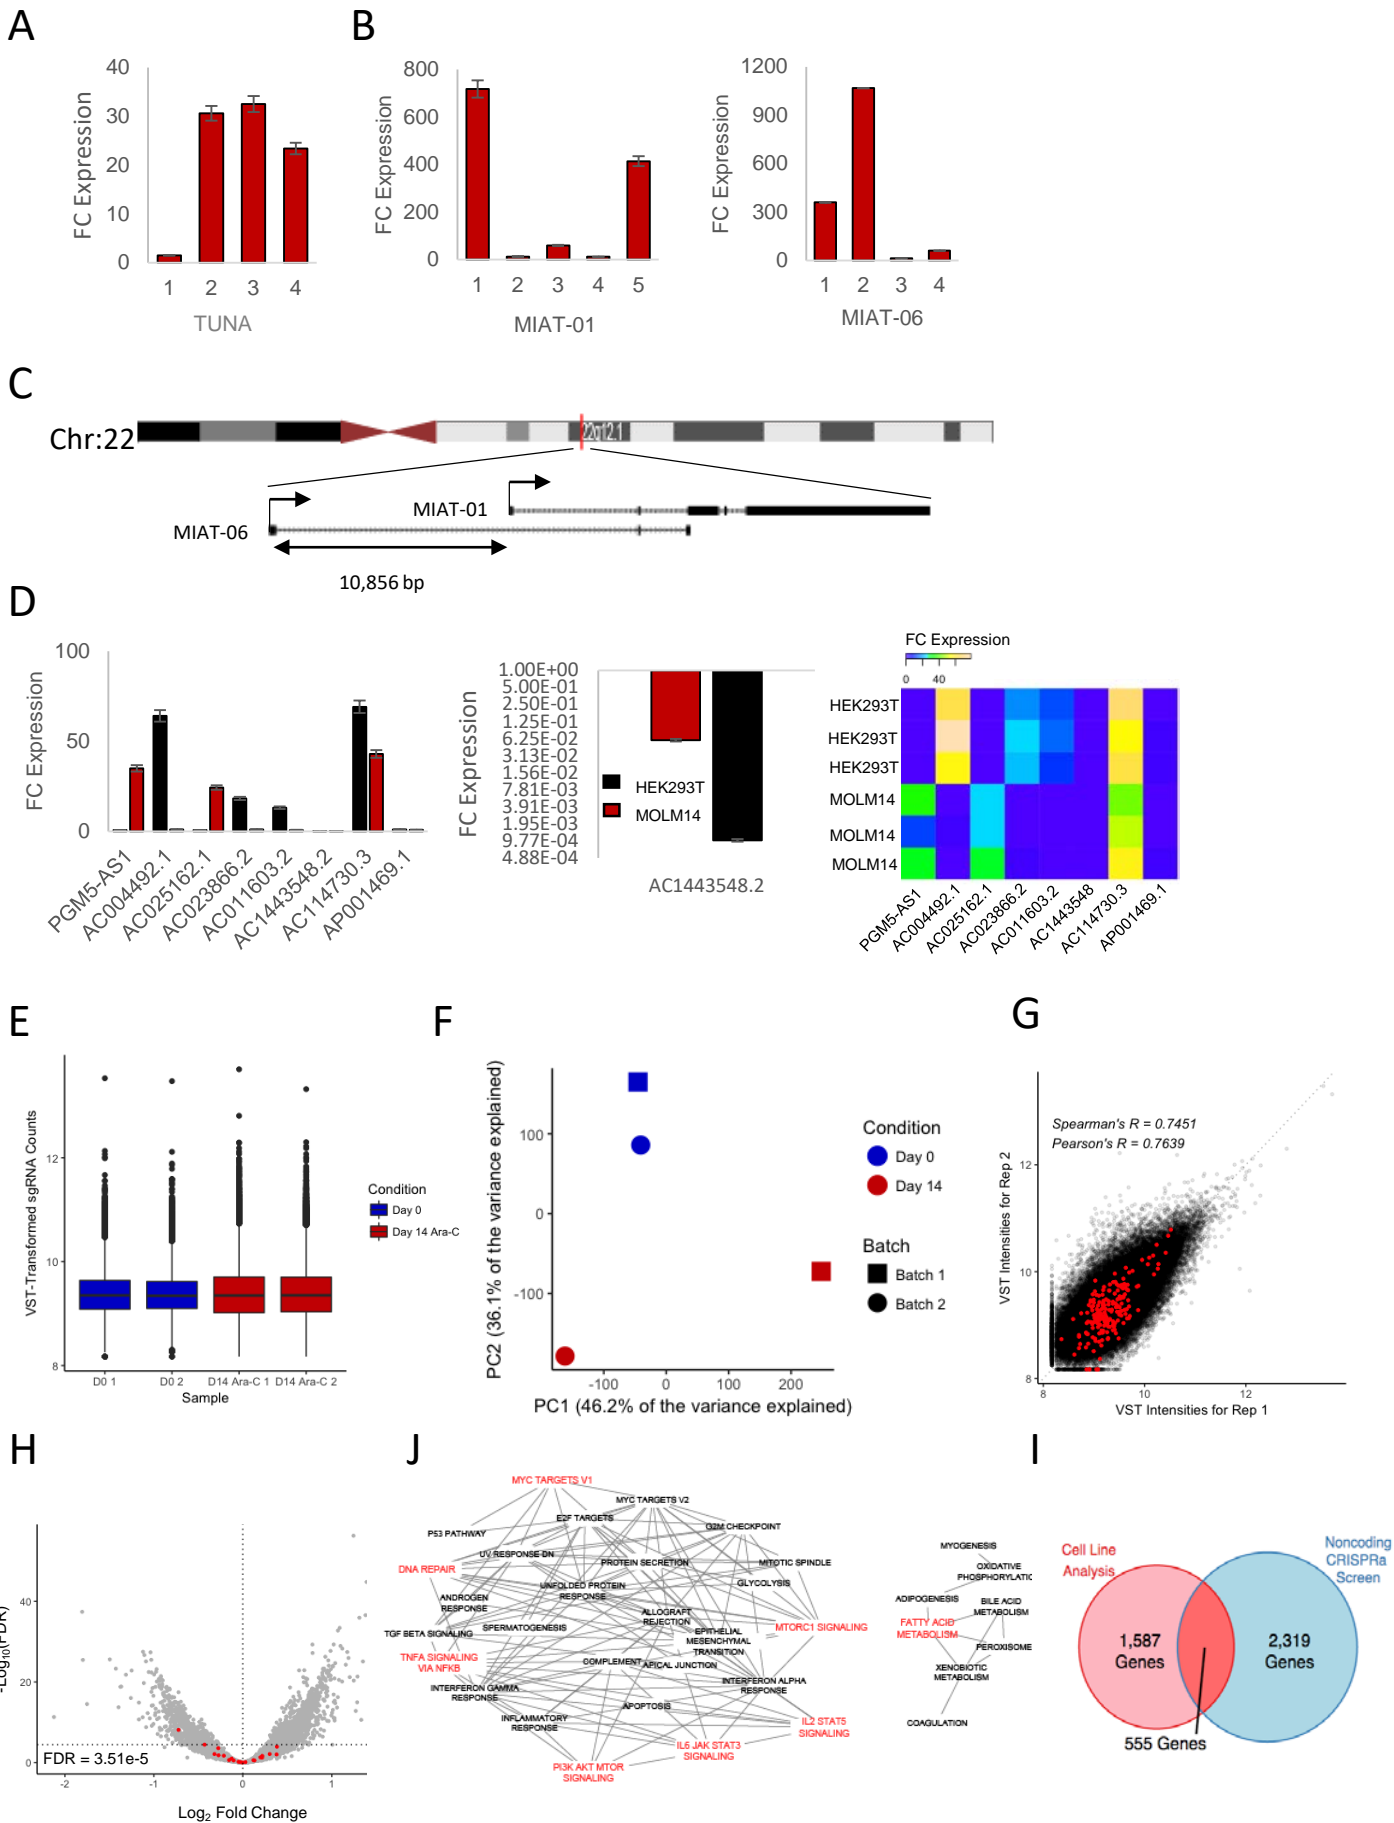

Supplement: NIHMS960108-supplement-4.pdf [file NIHMS960108-supplement-4.pdf]

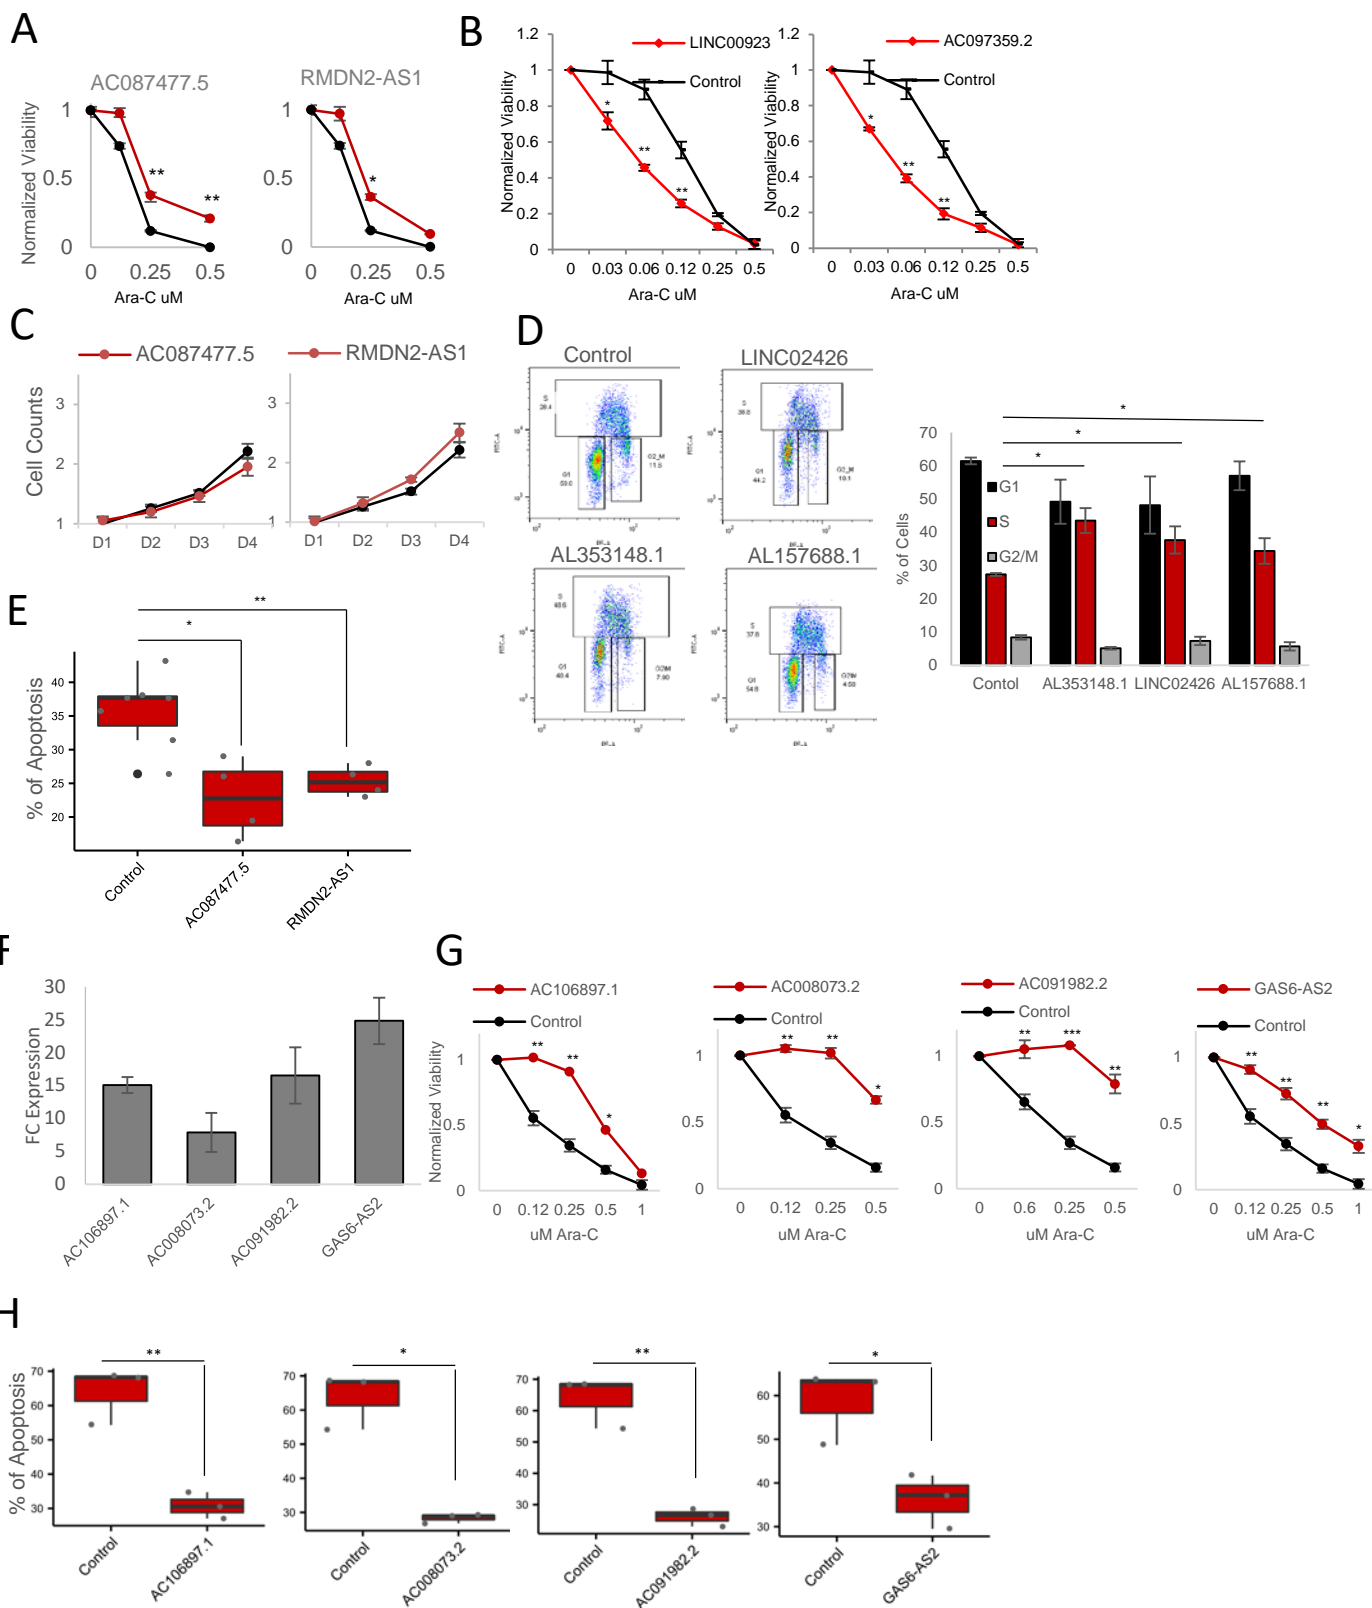

Supplement: NIHMS960108-supplement-5.pdf [file NIHMS960108-supplement-5.pdf]

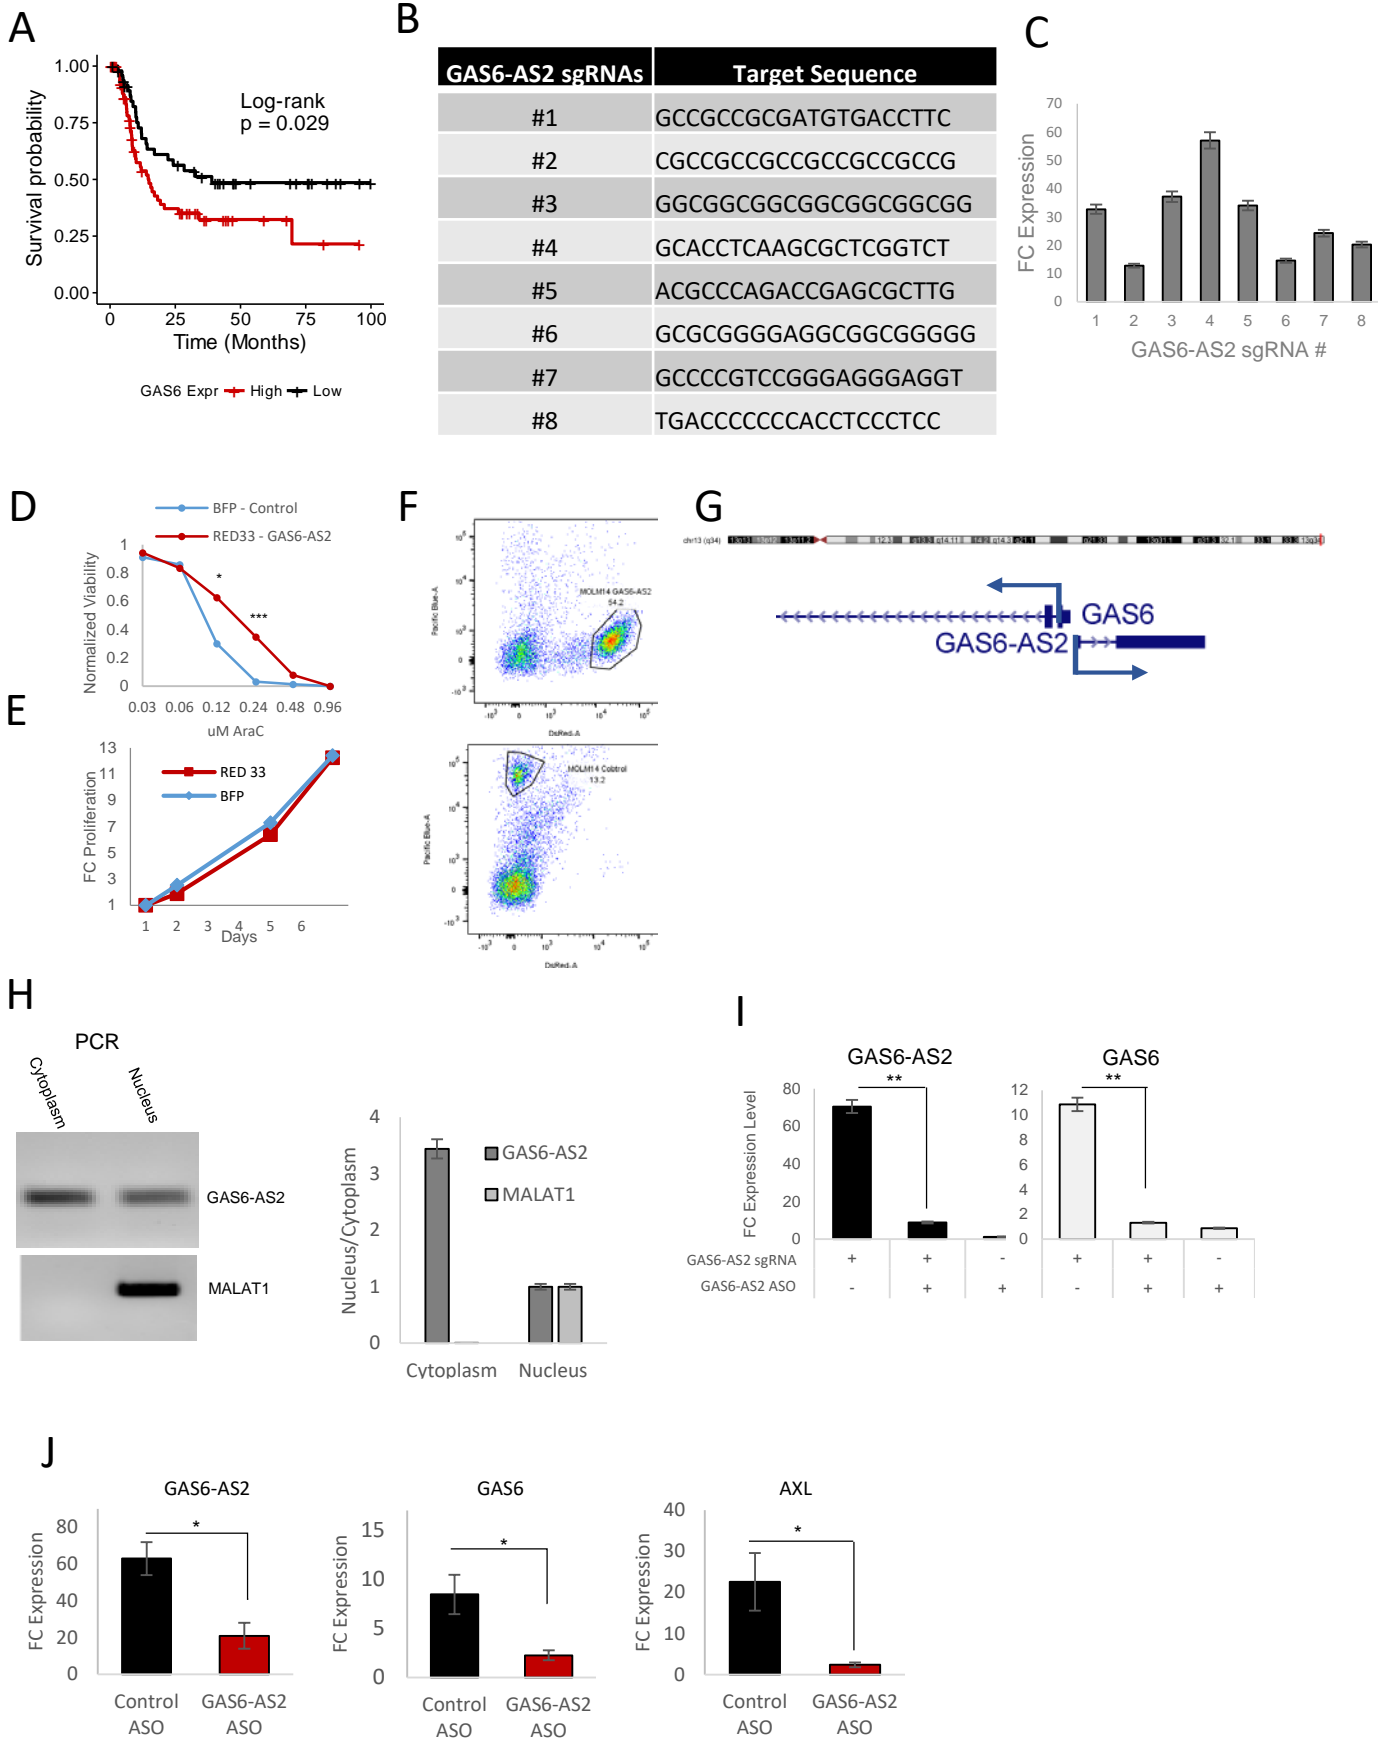

Supplement: NIHMS960108-supplement-6.pdf [file NIHMS960108-supplement-6.pdf]

A

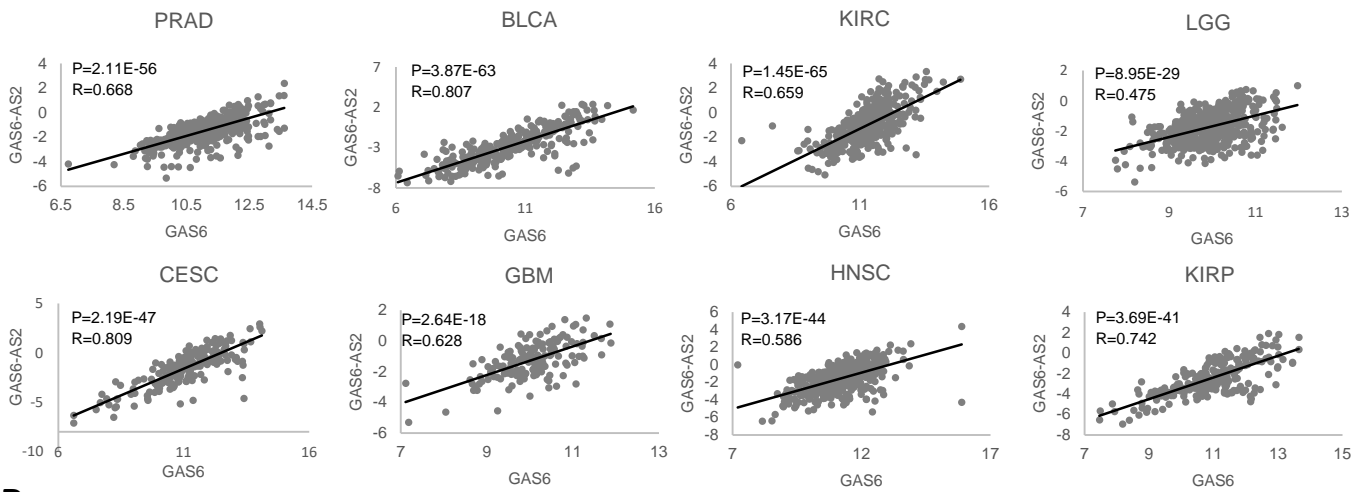

B

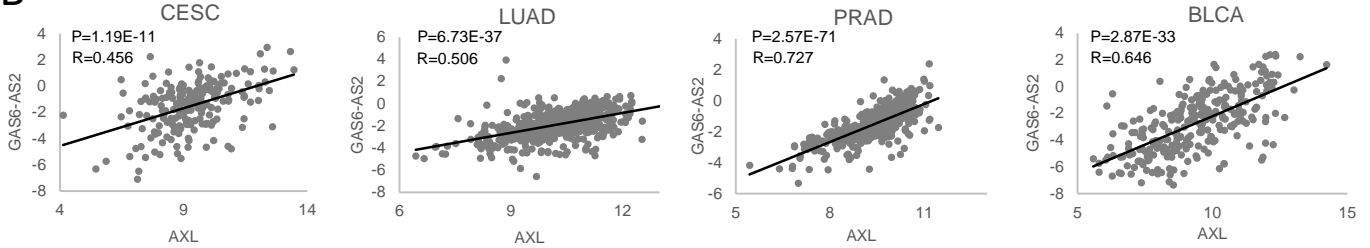

C

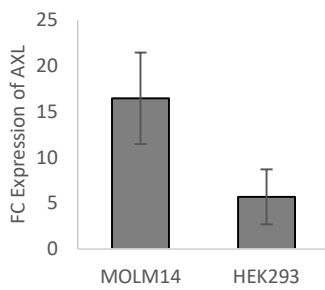

D

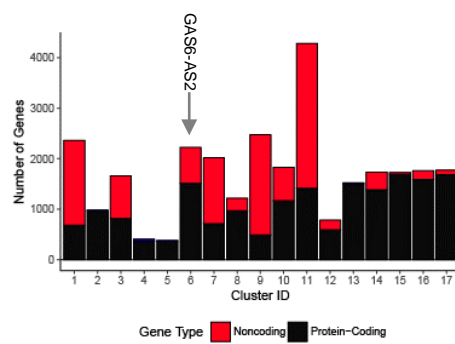

E

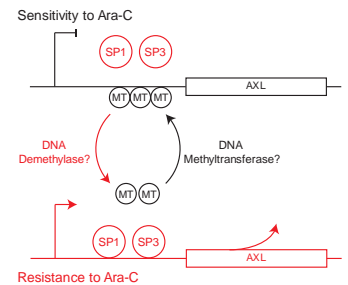

Supplement: NIHMS960108-supplement-7.pdf [file NIHMS960108-supplement-7.pdf]
